# Supplementary material for: A novel luminescent Pb(ii) – organic framework exhibiting a rapid and selective detection of trace amounts of NACs and Fe3+ with excellent recyclability
Source: Royal Society of Chemistry journal article supplement (doi:10.1039/c7dt00715a), 2017-01-01
Supplement: c7dt00715a1.pdf [file c7dt00715a1.pdf]

## A novel luminescent Pb(II) - organic framework exhibiting rapid and selective detection of trace amount of NACs and Fe<sup>3+</sup> with excellent recyclability

Xuan Luo<sup>a</sup>, Xiao Zhang<sup>\*a,c</sup>, Yuanling Duan<sup>a</sup>, Xiaolin Wang<sup>b</sup>, Jiaming Zhao<sup>b</sup>

### Supporting information

#### Figure cation

- Fig. S1 A view of the asymmetric unit and some symmetry-related atoms in **1**
- Fig. S2 The IR spectra of H<sub>2</sub>L ligand and **1**
- Fig. S3 Powder XRD of simulated from the single-crystal data of **1** and synthesized compound **1**
- Fig. S4 Thermogravimetric analyses curve of **1**.
- Fig. S5 Power patterns of **1** in different temperature.
- Fig. S6 Solid-state emission spectra of compound **1** and free H<sub>2</sub>L ligand when excited at 260 nm, respectively.
- Fig. S7 Emission spectra of compound **1** and free H<sub>2</sub>L ligand dispersed in water when excited at 260 nm, respectively.
- Fig. S8 Emission spectra of **1** dispersed in different solvents when excited at 260 nm.
- Fig. S9 Power patterns of **1** immersed in different solvents at room temperature.
- Fig. S10 Solid UV spectra of compound **1**.
- Fig. S11 - S18 (a) The luminescence intensity of **1** upon incremental addition of NACs solution (5 mM) in water. (b) Stern-Volmer plot for the luminescence intensity of **1** upon the addition of NACs solution (5 mM) in water.
- Fig. S19 - S27 The fitting curve of the luminescence intensity of **1** at different NACs concentration (linear range 0-0.025 mM).
- Fig. S28 HOMO and LUMO of H<sub>2</sub>L ligand and NACs.
- Fig. S29 Spectral overlap between normalized absorbance spectra of NACs and emission spectra of **1**.
- Fig. S30 The fitting curve of the luminescence intensity of **1** at different Fe<sup>3+</sup> concentration (linear range 0-0.13 mM).
- Fig. S31 Power XRD patterns of **1** after three recycles.
- Fig. S32 Powder XRD patterns of simulated from the single-crystal data of **1** and synthesized compound and Fe<sup>3+</sup>-**1**.
- Fig. S33 Spectral overlap between normalized absorbance spectra of metal ions and emission spectra of **1**.
- Fig. S34 The XPS of Fe<sup>3+</sup>-**1** shows the typical peak of Fe<sup>3+</sup> at 710 eV.
- Fig. S35- S37. The luminescence intensity of **1** upon addition 4 μL and 8 μL of Fe<sup>3+</sup> ions (25 mM) in drinking, tap, river water.

Table S1 Selected bond lengths (Å) and angles (°) for **1**

Table S2 Summary of quenching constants ( $K_{SV}$ ) for **1** sensing of NACs at room temperature.

Table S3 Summary of limit detection (M) for **1** sensing of NACs at room temperature.

Table S4 HOMO and LUMO energies for calculated NACs at B3LYP/6-31G\* level of theory

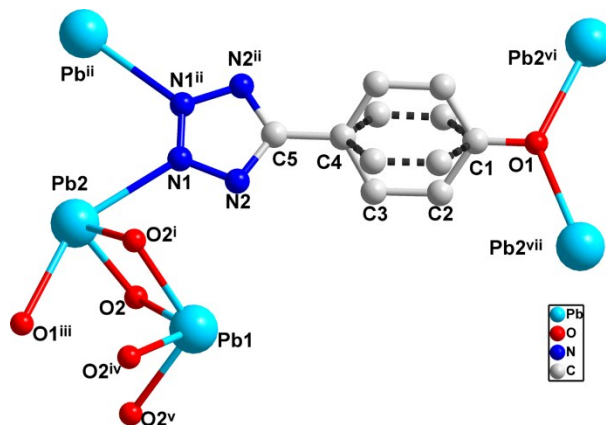

Fig. S1 A view of the asymmetric unit and some symmetry-related atoms in **1**. Symmetry codes: (i)  $x, y, 1.5-z$ . (ii)  $2-x, y, 1.5-z$ . (iii)  $x-0.5, y-0.5, z$ . (iv)  $1-x, 1-y, z-0.5$ . (v)  $1-x, 1-y, 2-z$ . (vi)  $0.5+x, 0.5+y, z$ . (vii)  $1.5-x, 0.5+y, 1.5-z$ .

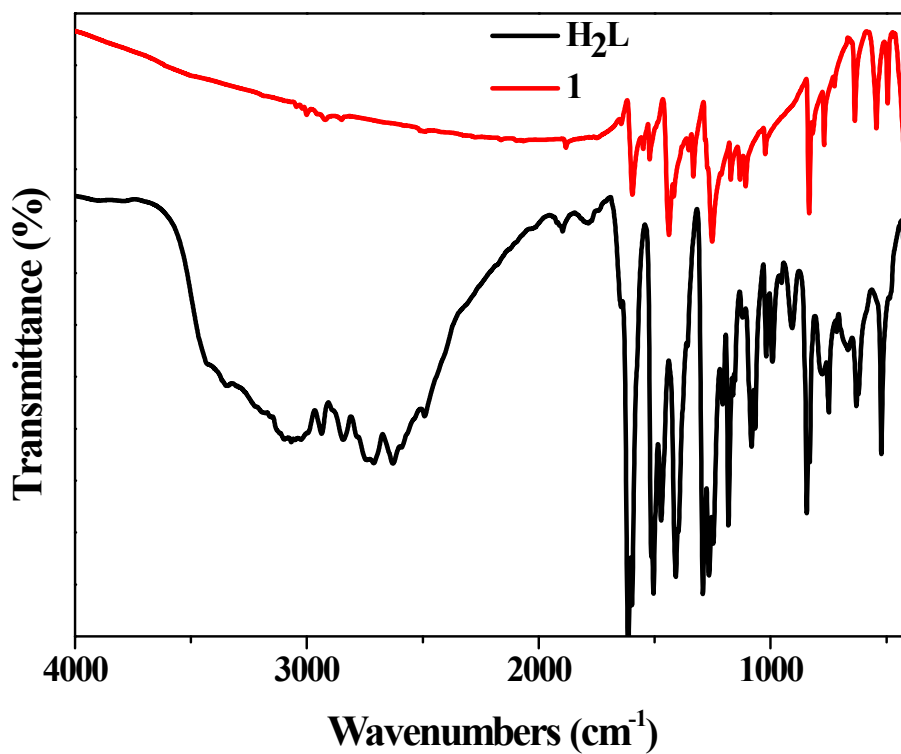

Fig. S2 The IR spectra of  $H_2L$  ligand and **1**

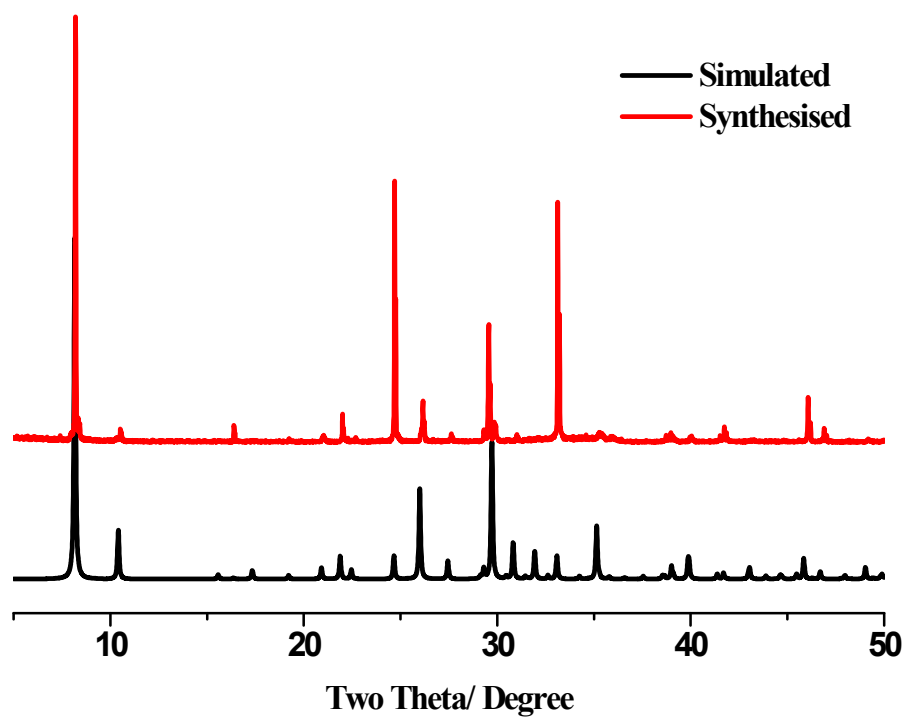

Fig. S3 Powder XRD of simulated from the single-crystal data of **1** (black) and synthesized compound **1**.

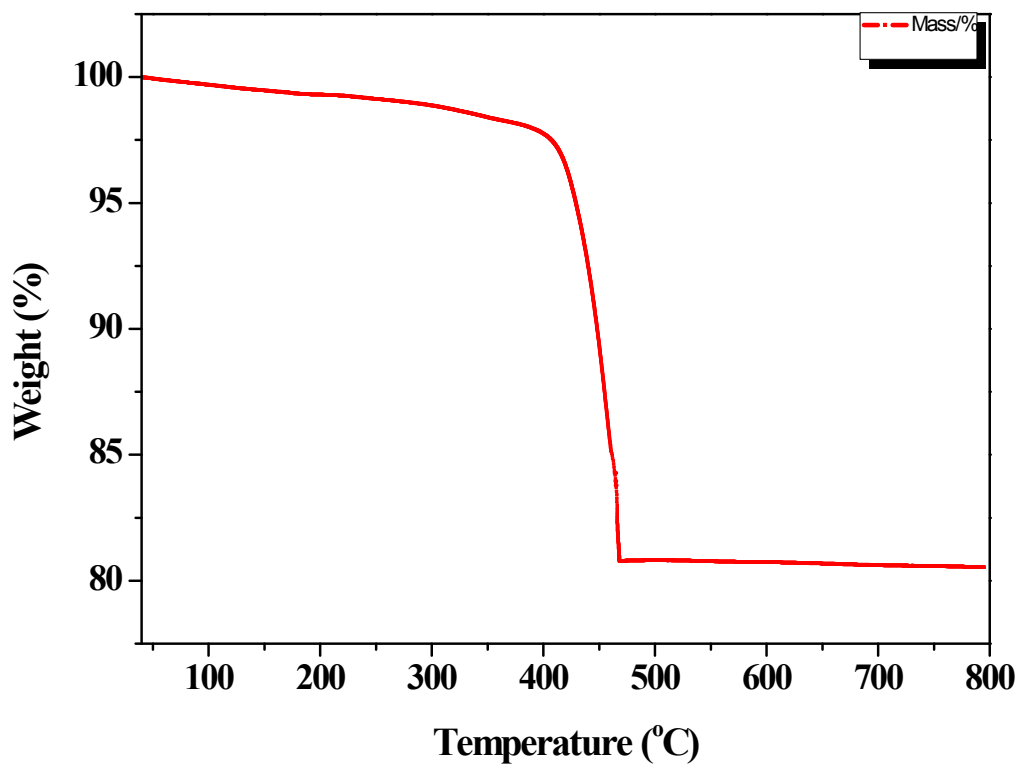

Fig.S4 Thermogravimetric analyses curve of **1**, the weight loss of 80.73 % is close to the calculated value (81.30 %).

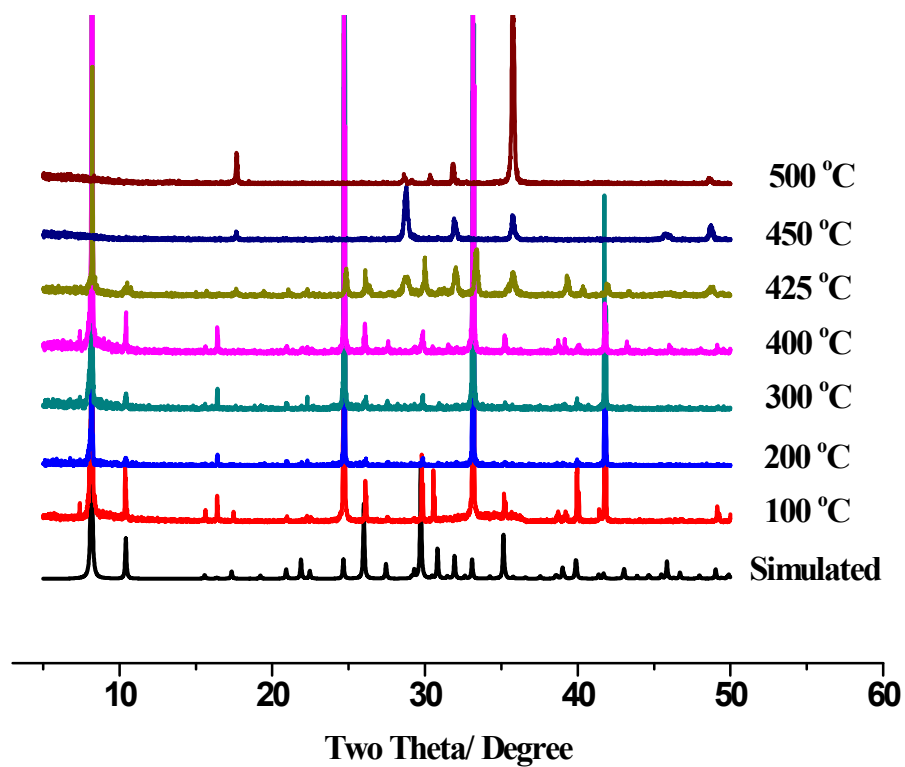

Fig. S5 Power patterns of 1 in different temperature.

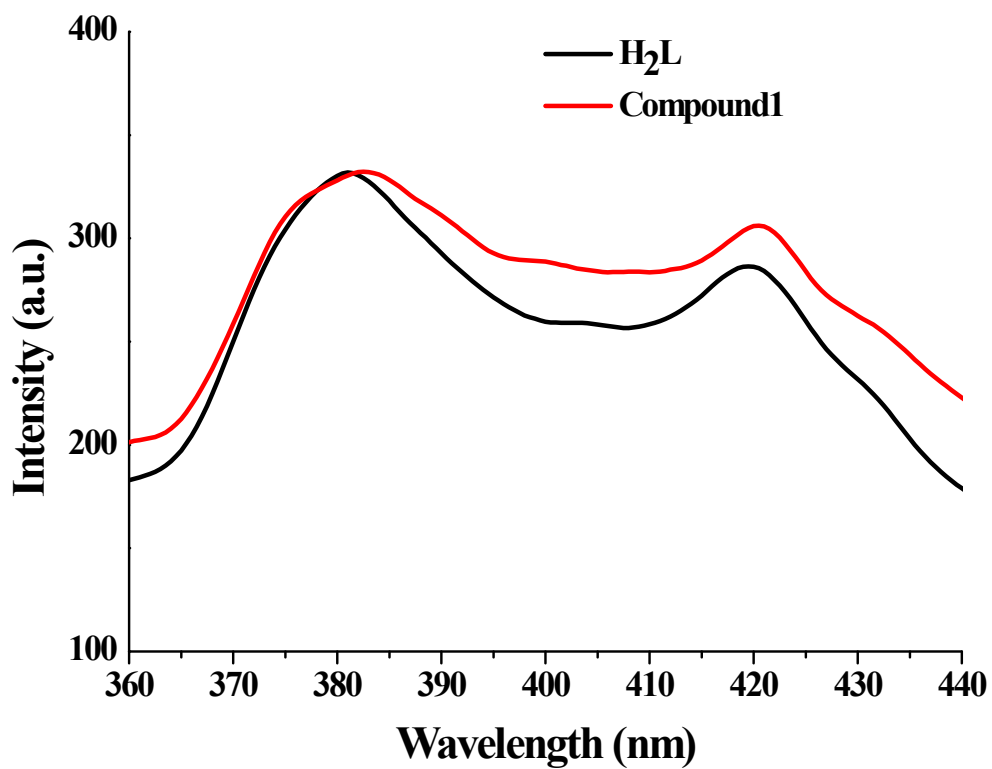

Fig. S6 Solid-state emission spectra of compound 1 and free H<sub>2</sub>L ligand when excited at 260 nm, respectively.

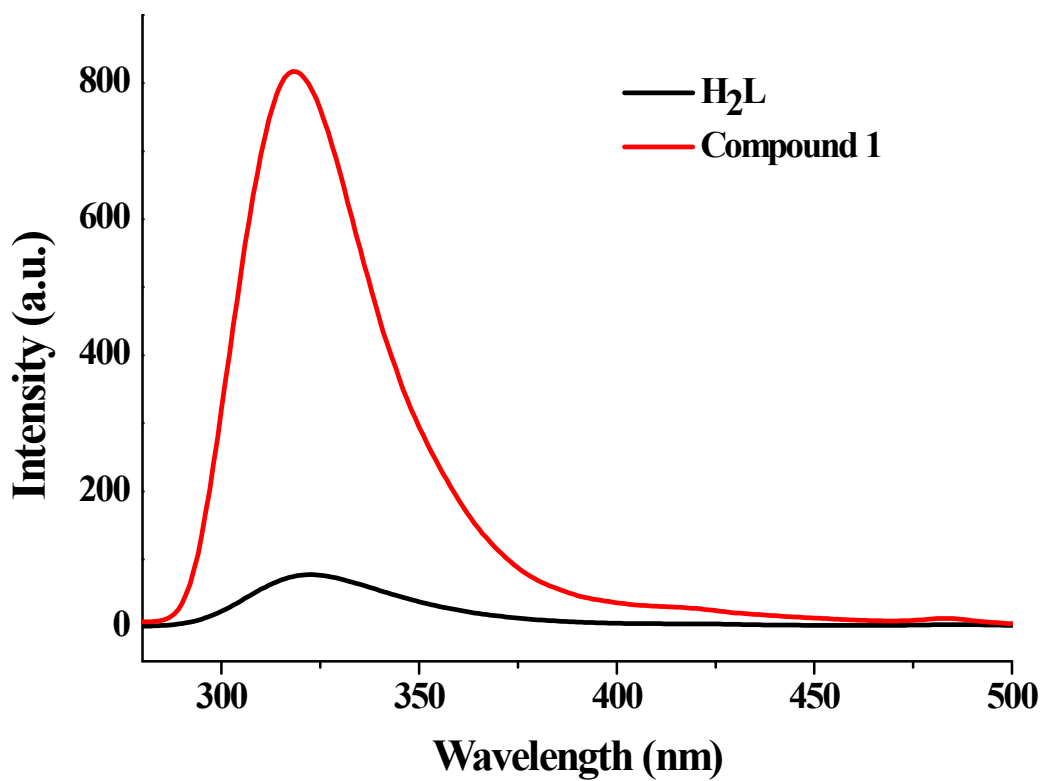

Fig. S7 Emission spectra of compound 1 and free H<sub>2</sub>L ligand dispersed in water when excited at 260 nm, respectively.

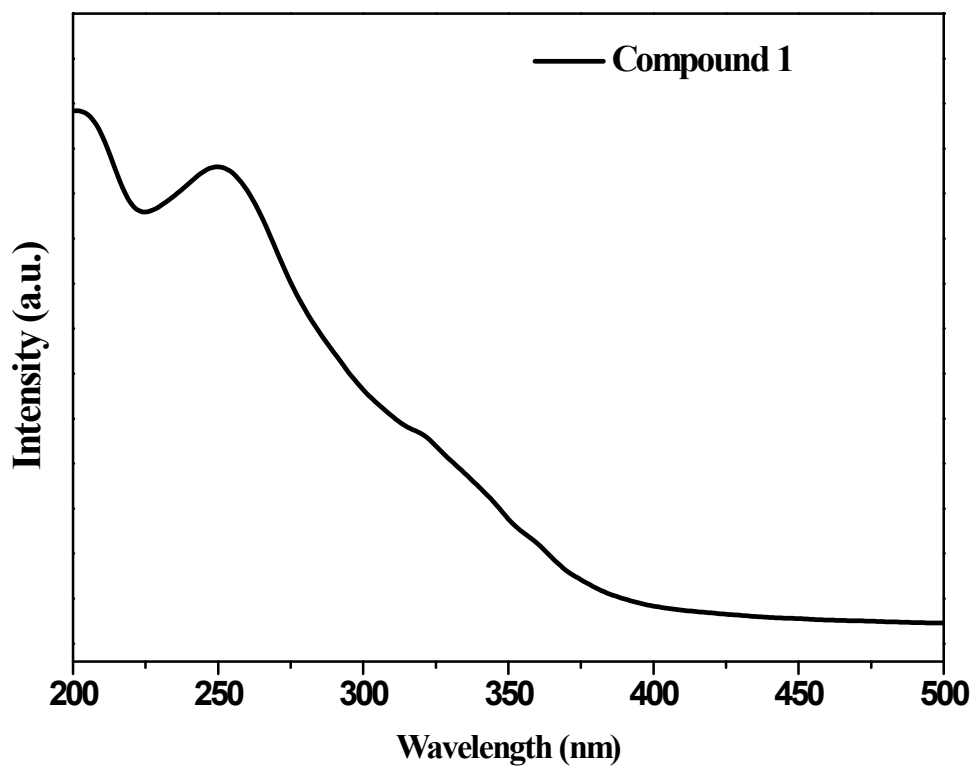

Fig. S8 Solid UV spectra of compound 1.

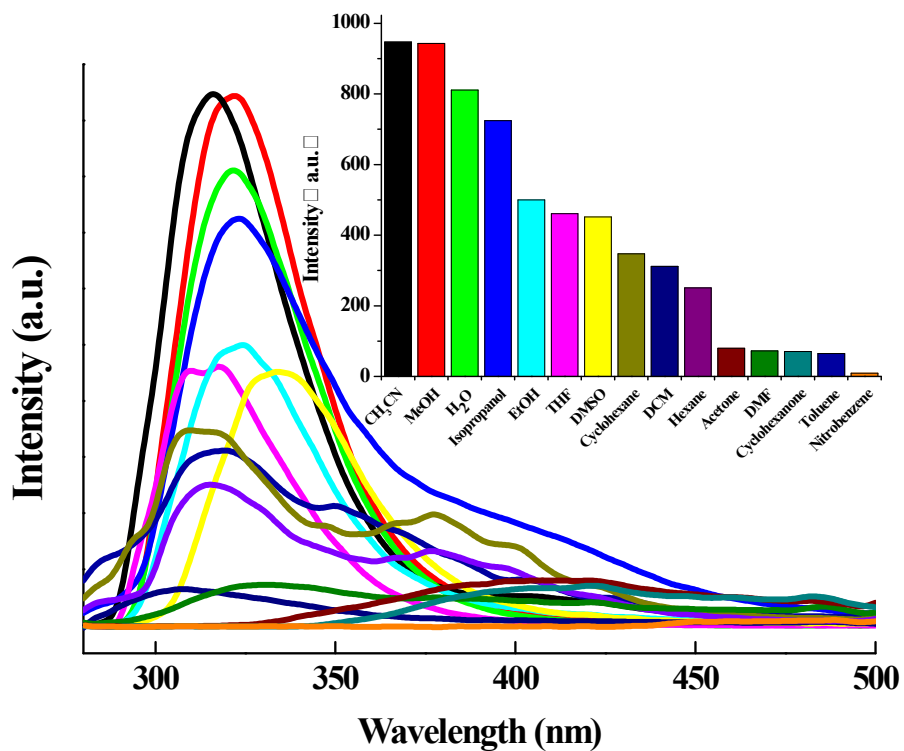

Fig. S9 Emission spectra of **1** dispersed in different solvents when excited at 260 nm.

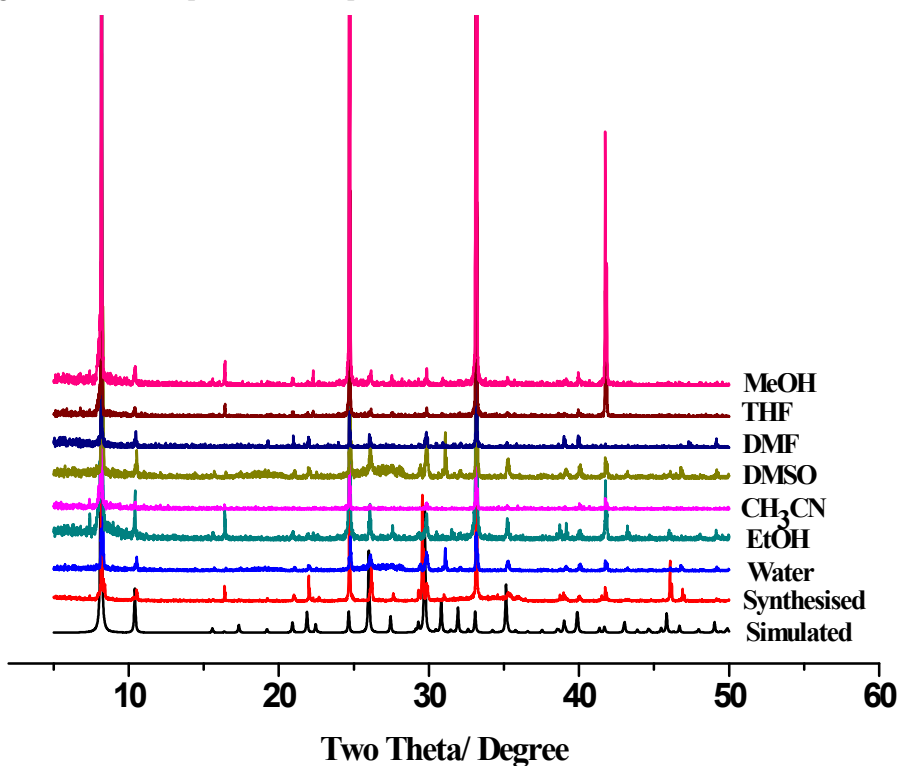

Fig. S10 Power XRD patterns of **1** immersed in different solvents at room temperature.

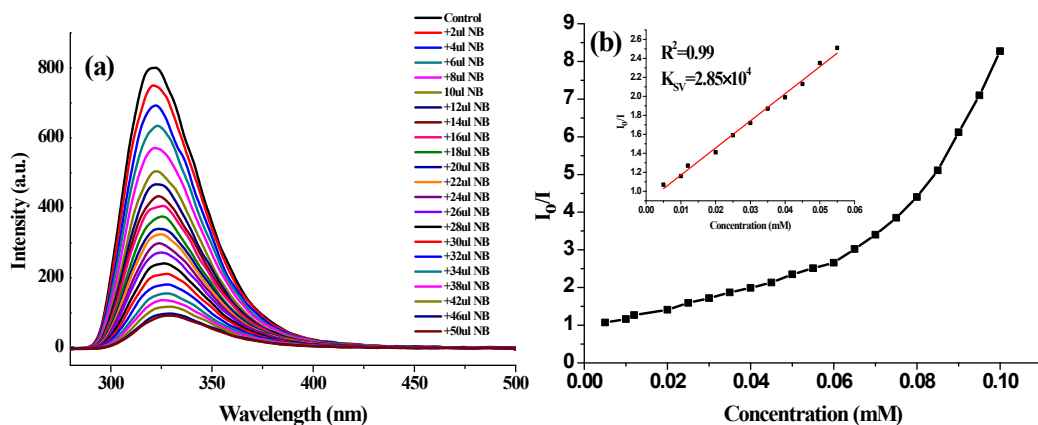

Fig. S11 (a) The luminescence intensity of **1** upon incremental addition of NB solution (5 mM) in water. (b) Stern-Volmer plot for the luminescence intensity of **1** upon the addition of NB solution (5 mM) in water.

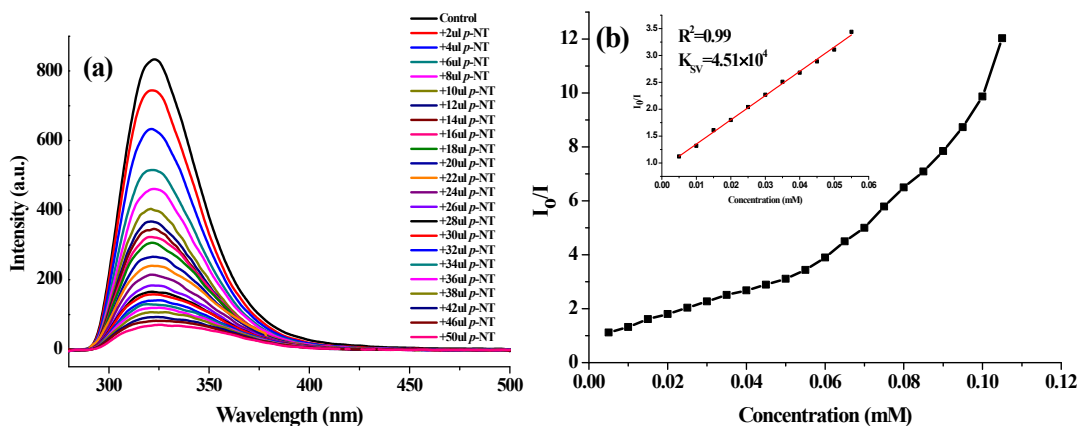

Fig. S12 (a) The luminescence intensity of **1** upon incremental addition of *p*-NT solution (5 mM) in water. (b) Stern-Volmer plot for the luminescence intensity of **1** upon addition of *p*-NT solution (5 mM) in water.

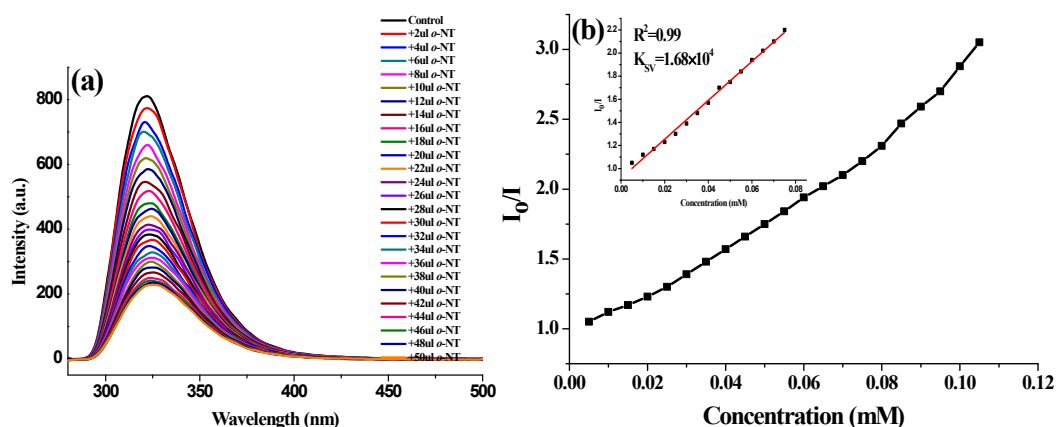

Fig.S13 (a) The luminescence intensity of **1** upon incremental addition of *o*-NT solution (5 mM) in water. (b) Stern-Volmer plot for the luminescence intensity of **1** upon addition of *o*-NT solution (5 mM) in water.

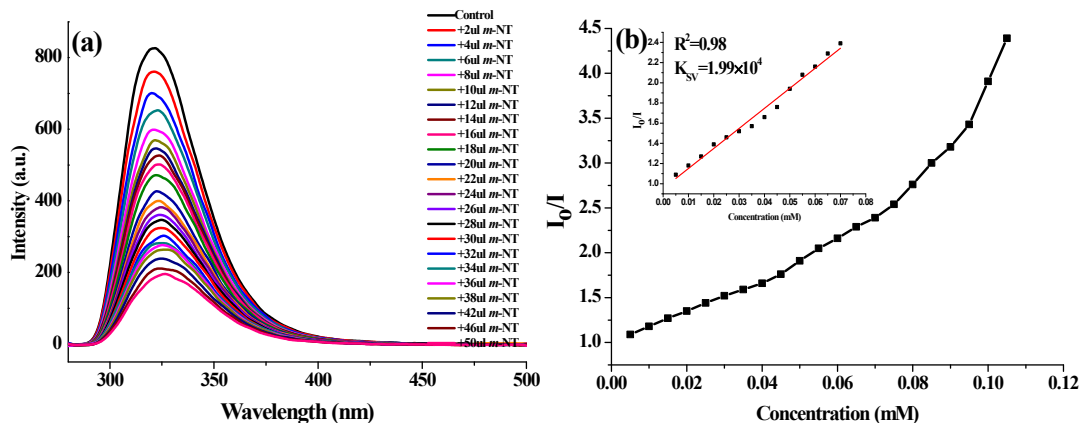

Fig. S14 (a) The luminescence intensity of **1** upon incremental addition of *m*-NT solution (5 mM) in water. (b) Stern-Volmer plot for the luminescence intensity of **1** upon addition of *m*-NT solution (5 mM) in water.

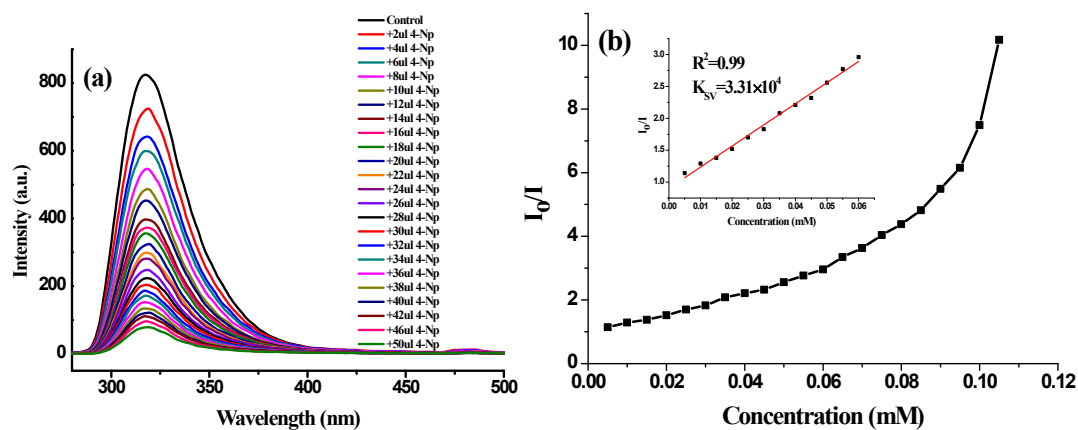

Fig. S15 (a) The luminescence intensity of **1** upon incremental addition of 4-Np solution (5 mM) in water. (b) Stern-Volmer plot for the luminescence intensity of **1** upon addition of 4-Np solution (5 mM) in water.

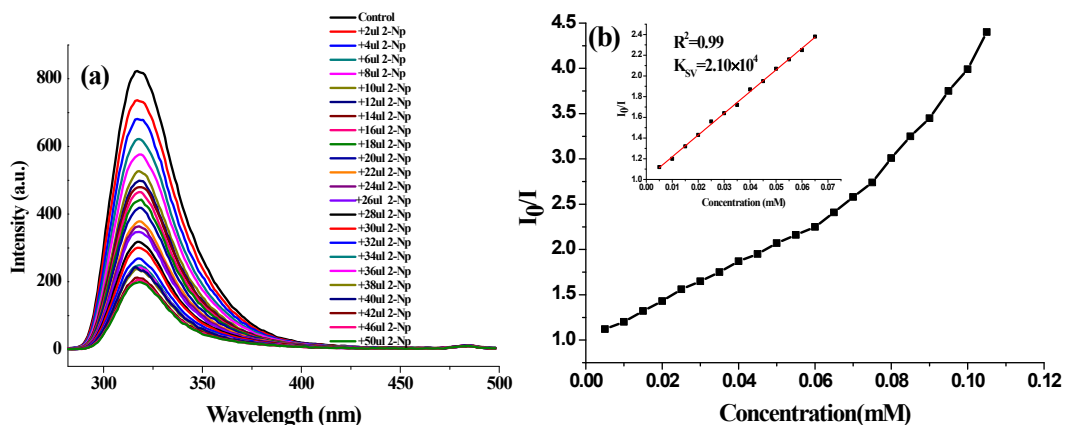

Fig. S16 (a) The luminescence intensity of **1** upon incremental addition of 2-Np solution (5 mM) in water (b) Stern-Volmer plot for the luminescence intensity of **1** upon addition of 2-Np solution (5 mM) in water.



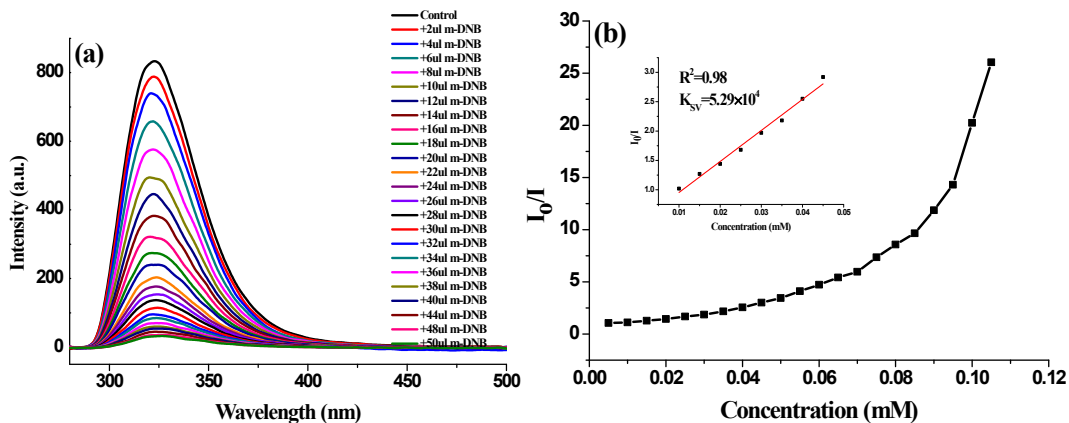

Fig. S17 (a) The luminescence intensity of **1** upon incremental addition of *m*-DNB solution (5 mM) in water. (b) Stern-Volmer plot for the luminescence intensity of **1** upon addition of *m*-DNB solution (5 mM) in water.

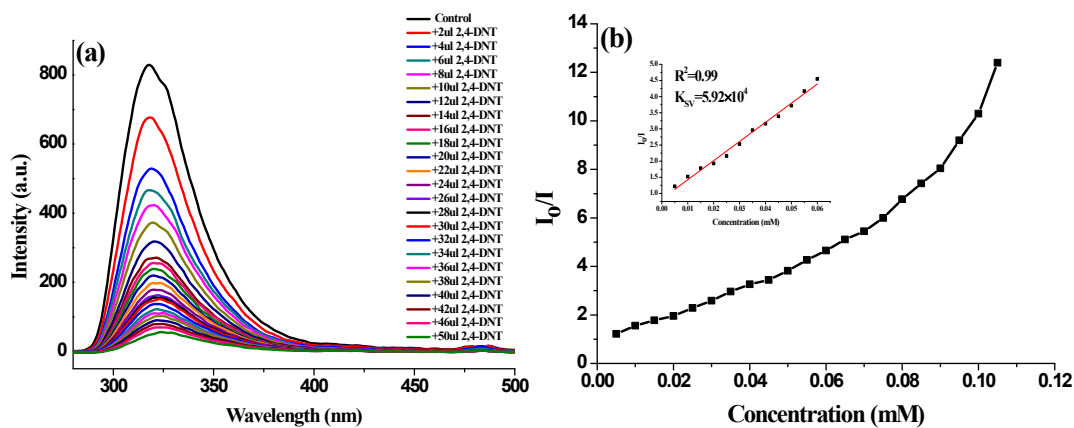

Fig.S18 (a) The luminescence intensity of **1** upon incremental addition of 2, 4-DNT solution (5 mM) in water. (b) Stern-Volmer plot for the luminescence intensity of **1** upon addition of 2, 4-DNT solution (5 mM) in water.

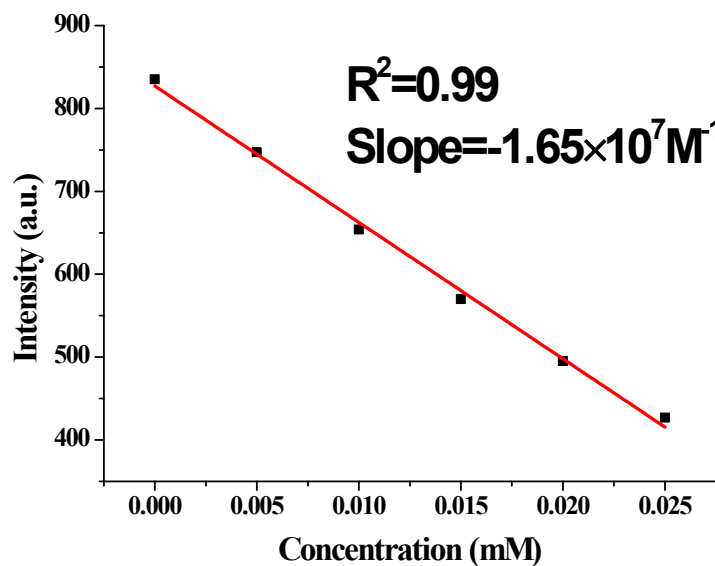

---

Linear Equation:  $Y = -16457X + 827.04$   $R = 0.9960$

Slope =  $1.65 \times 10^7 \text{ M}^{-1}$

$\delta = 8.72$  (N=10)

Limit detection =  $3\delta/\text{Slope} = 1.58 \times 10^{-6} \text{ M}$

Fig. S19 The fitting curve of the luminescence intensity of **1** at different PA concentration (linear range 0-0.025 mM).

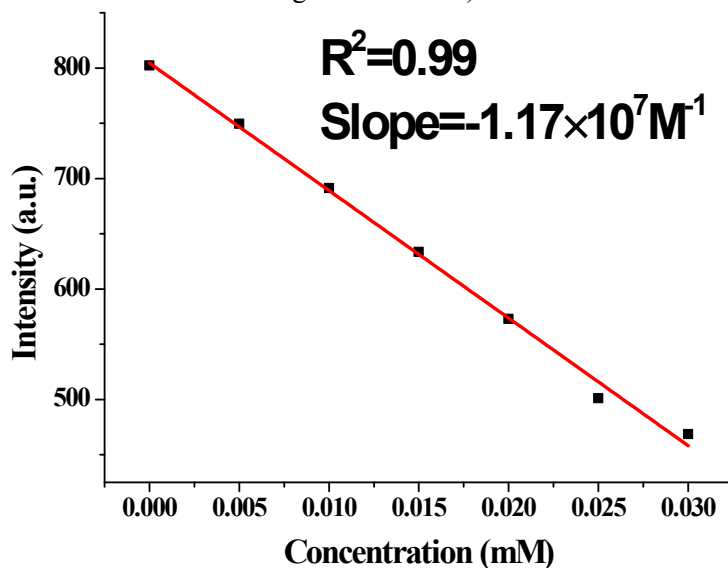

Slope =  $1.17 \times 10^7 \text{ M}^{-1}$

$\delta = 8.72$  (N=10)

Limit detection =  $3\delta/\text{Slope} = 2.24 \times 10^{-6} \text{ M}$

Fig. S20 The fitting curve of the luminescence intensity of **1** at different NB concentration (linear range 0-0.030 mM).

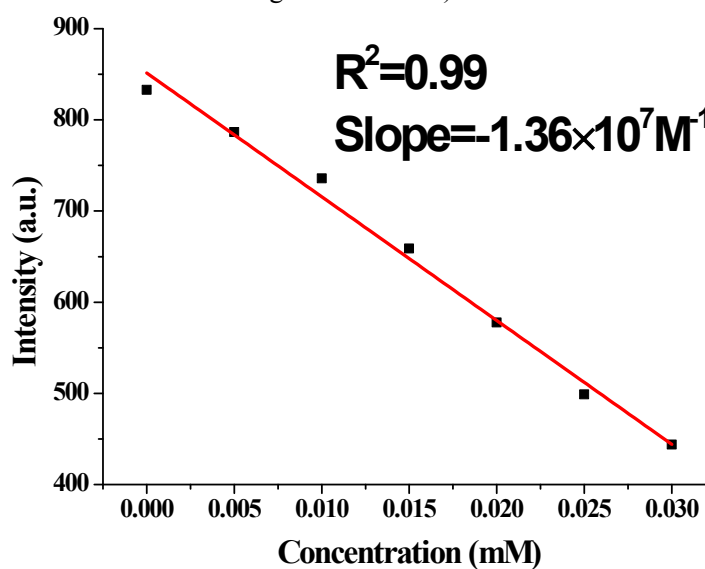

Slope =  $1.36 \times 10^7 \text{ M}^{-1}$

$\delta = 8.72$  (N=10)

Limit detection =  $3\delta/\text{Slope} = 1.92 \times 10^{-6} \text{ M}$

Fig. S21 The fitting curve of the luminescence intensity of **1** at different *m*-DNB concentration (linear range 0-0.030 mM).

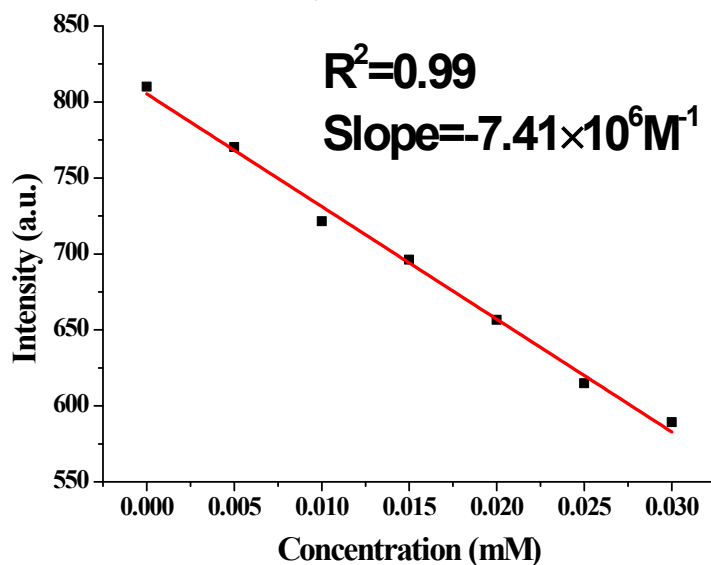

$$\text{Slope} = 7.41 \times 10^6 \text{ M}^{-1}$$

$$\delta = 8.72 \text{ (N=10)}$$

$$\text{Limit detection} = 3\delta/\text{Slope} = 3.53 \times 10^{-6} \text{ M}$$

Fig. S22 The fitting curve of the luminescence intensity of **1** at different *o*-NT concentration (linear range 0-0.030 mM).

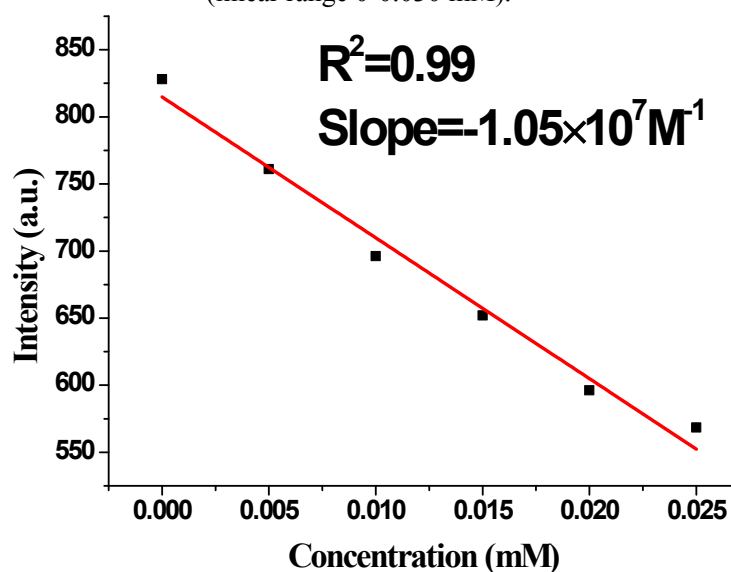

$$\text{Slope} = 1.05 \times 10^7 \text{ M}^{-1}$$

$$\delta = 8.72 \text{ (N=10)}$$

$$\text{Limit detection} = 3\delta/\text{Slope} = 2.49 \times 10^{-6} \text{ M}$$

Fig. S23 The fitting curve of the luminescence intensity of **1** at different *m*-NT concentration (linear range 0-0.030 mM).

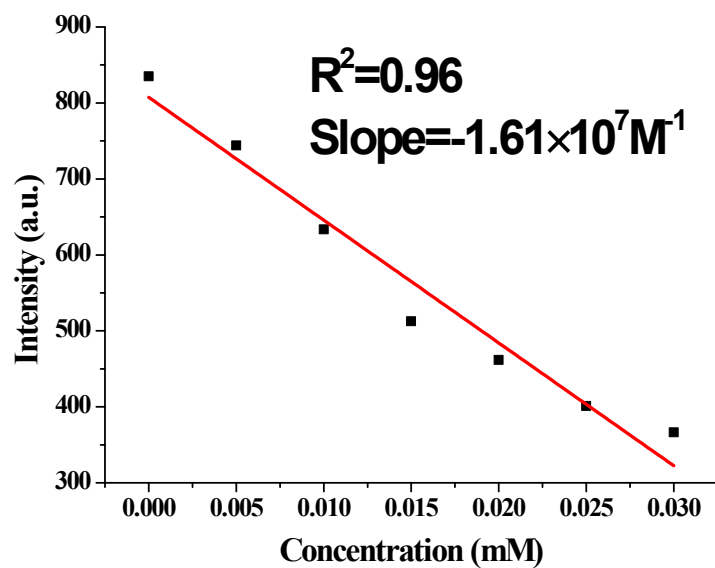

Slope =  $1.61 \times 10^7 M^{-1}$

$\delta=8.72$  (N=10)

Limit detection =  $3\delta/\text{Slope}=1.62 \times 10^{-6} M$

Fig. S24 The fitting curve of the luminescence intensity of **1** at different *p*-NT concentration (linear range 0-0.030 mM).

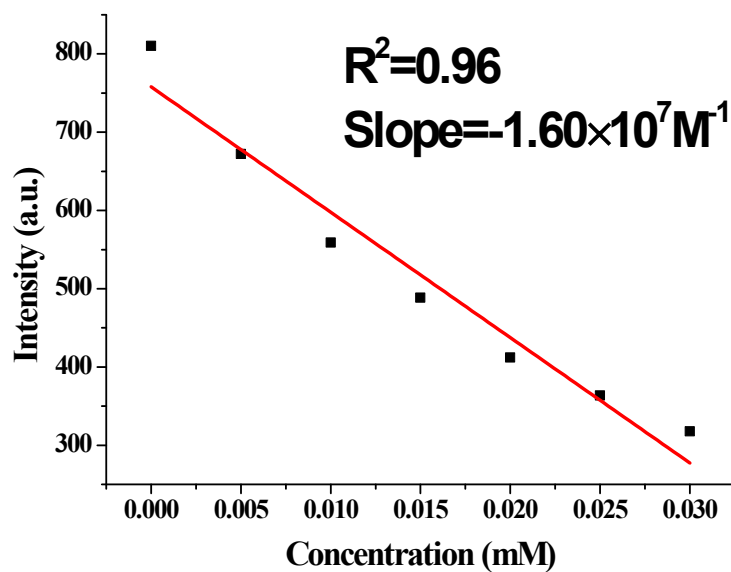

Slope =  $1.60 \times 10^7 M^{-1}$

$\delta=8.72$  (N=10)

Limit detection =  $3\delta/\text{Slope}=1.63 \times 10^{-6} M$

Fig. S25 The fitting curve of the luminescence intensity of **1** at different 2, 4 DNT concentration (linear range 0-0.030 mM).

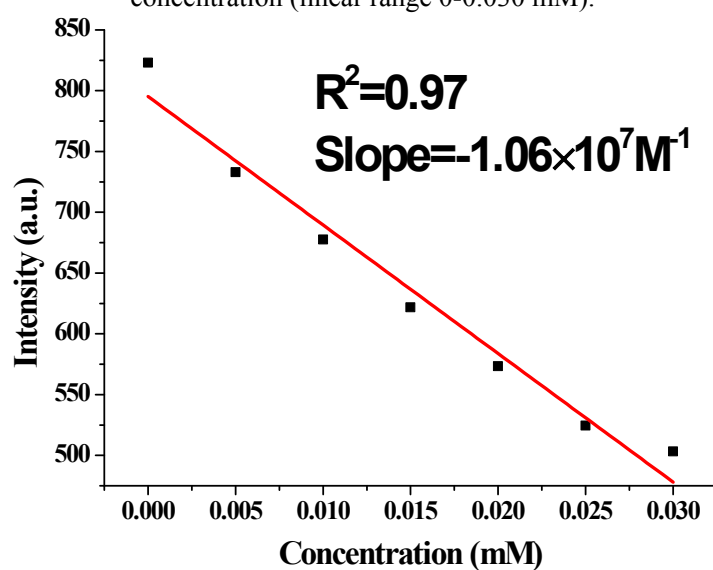

$$\text{Slope} = 1.06 \times 10^7 \text{ M}^{-1}$$

$$\delta = 8.72 \text{ (N=10)}$$

$$\text{Limit detection} = 3\delta/\text{Slope} = 2.46 \times 10^{-6} \text{ M}$$

Fig. S26 The fitting curve of the luminescence intensity of **1** at different 2-Np concentration (linear range 0-0.030 mM).

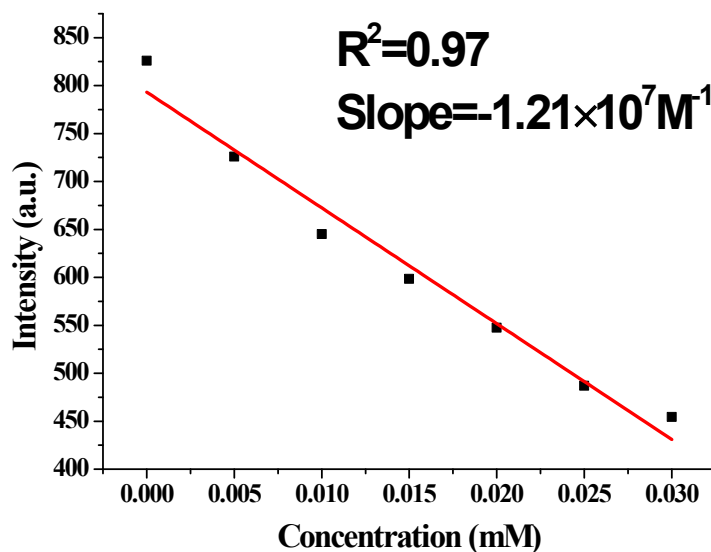

$$\text{Slope} = 1.21 \times 10^7 \text{ M}^{-1}$$

$$\delta = 8.72 \text{ (N=10)}$$

$$\text{Limit detection} = 3\delta/\text{Slope} = 2.16 \times 10^{-6} \text{ M}$$

Fig. S27 The fitting curve of the luminescence intensity of **1** at different 4-Np concentration (linear range 0-0.030 mM).

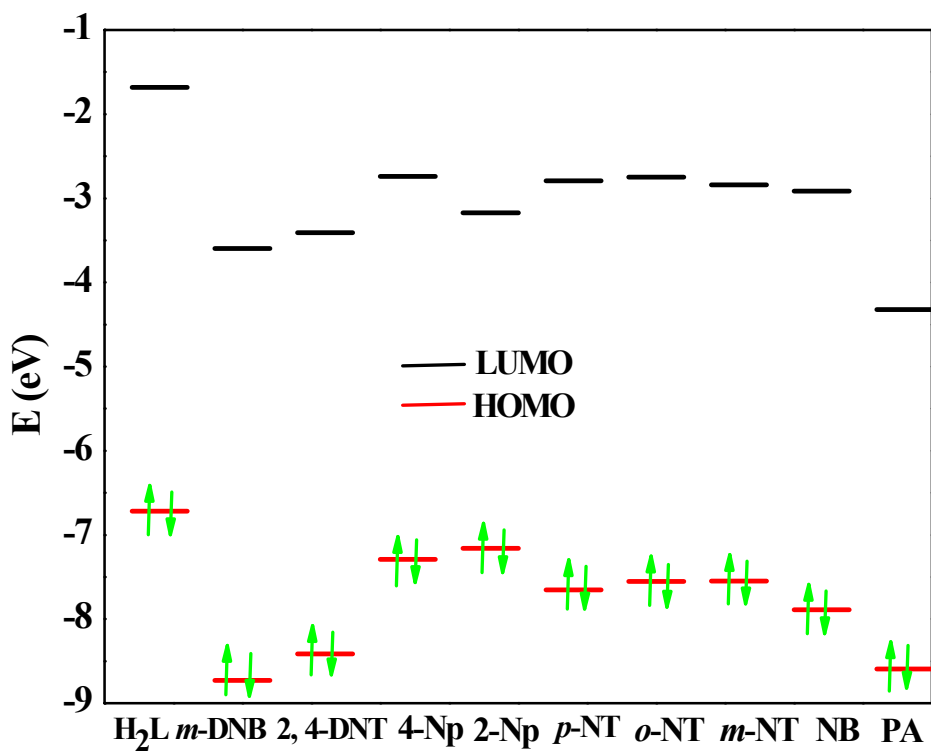

Fig. S28 HOMO and LUMO of  $H_2L$  ligand and NACs.

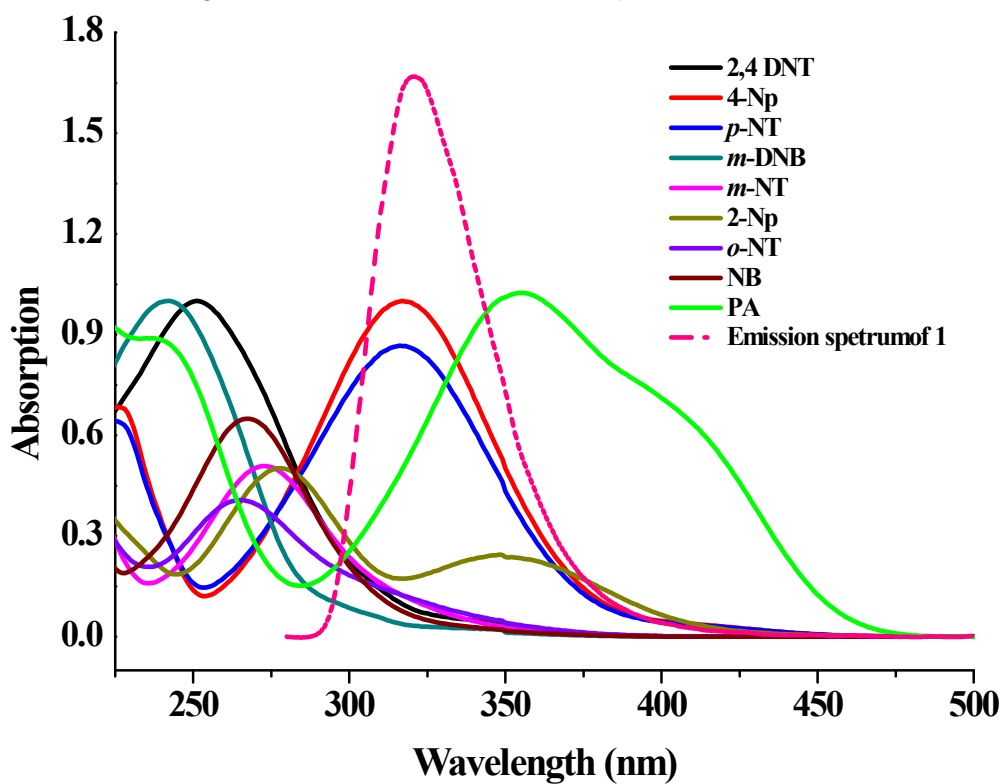

Fig. S29 Spectral overlap between normalized absorbance spectra of NACS and emission spectra of 1.

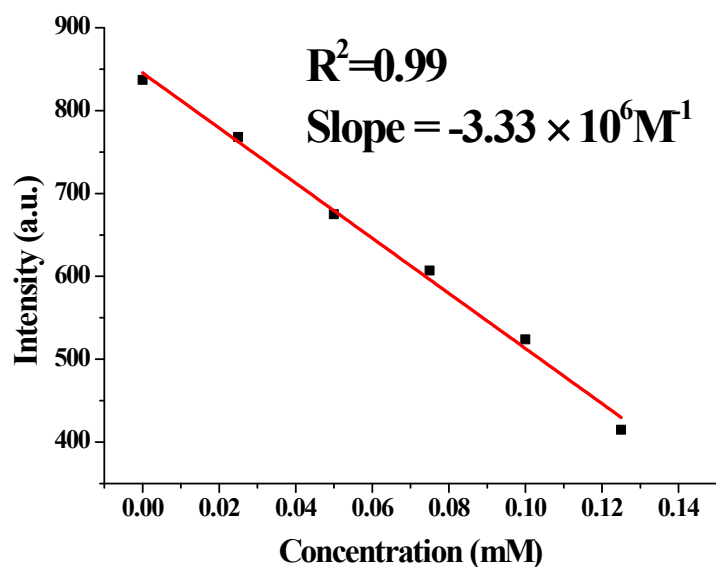

Linear Equation:  $Y = -3325.7X + 845.52$   $R = 0.9940$

Slope =  $3.33 \times 10^6 \text{ M}^{-1}$

$\delta = 8.71$  (N=10)

Limit detection =  $3\delta/\text{Slope} = 7.85 \times 10^{-6} \text{ M}$

Fig. S30 The fitting curve of the luminescence intensity of **1** at different  $\text{Fe}^{3+}$  concentration (linear range 0-0.13 mM).

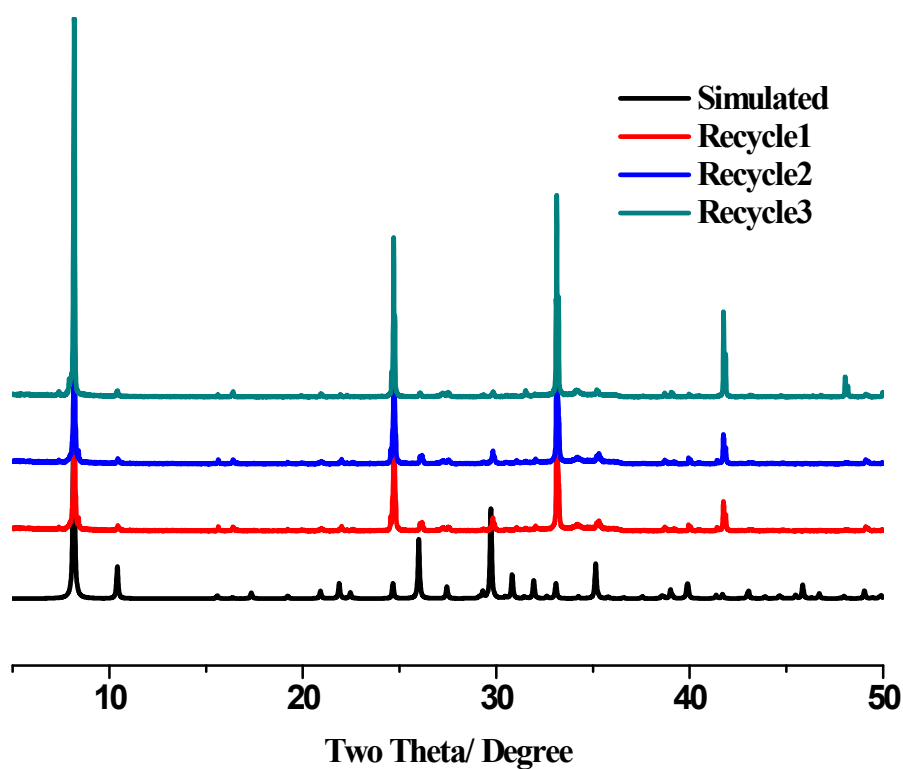

Fig. S31 Power XRD patterns of **1** after three recycles

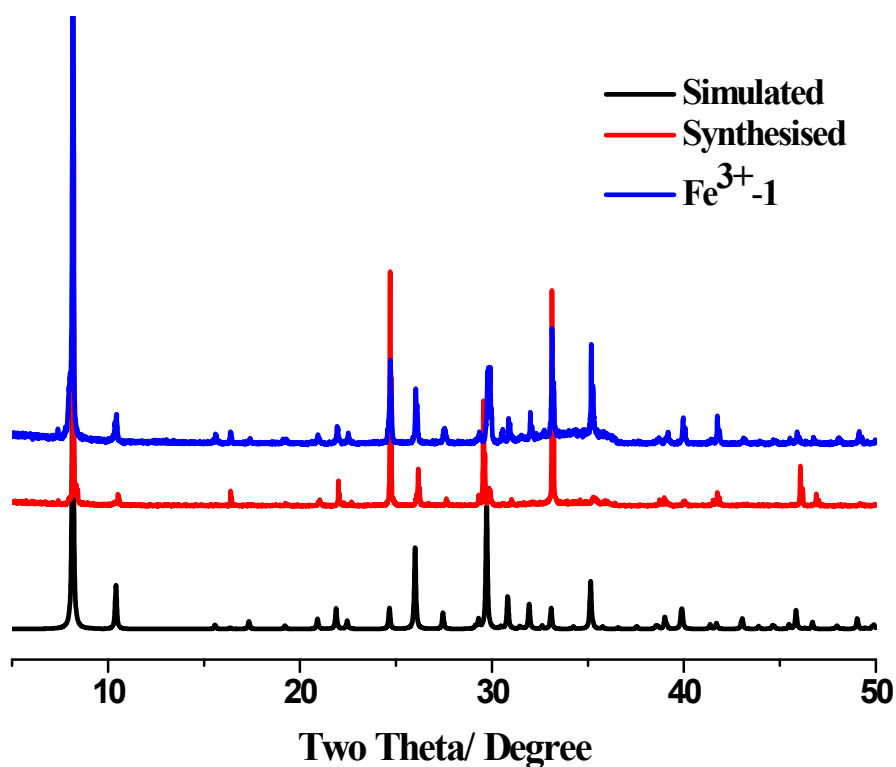

Fig. S32 Powder XRD patterns of simulated from the single-crystal data of **1** and synthesized compound and Fe<sup>3+</sup>-1

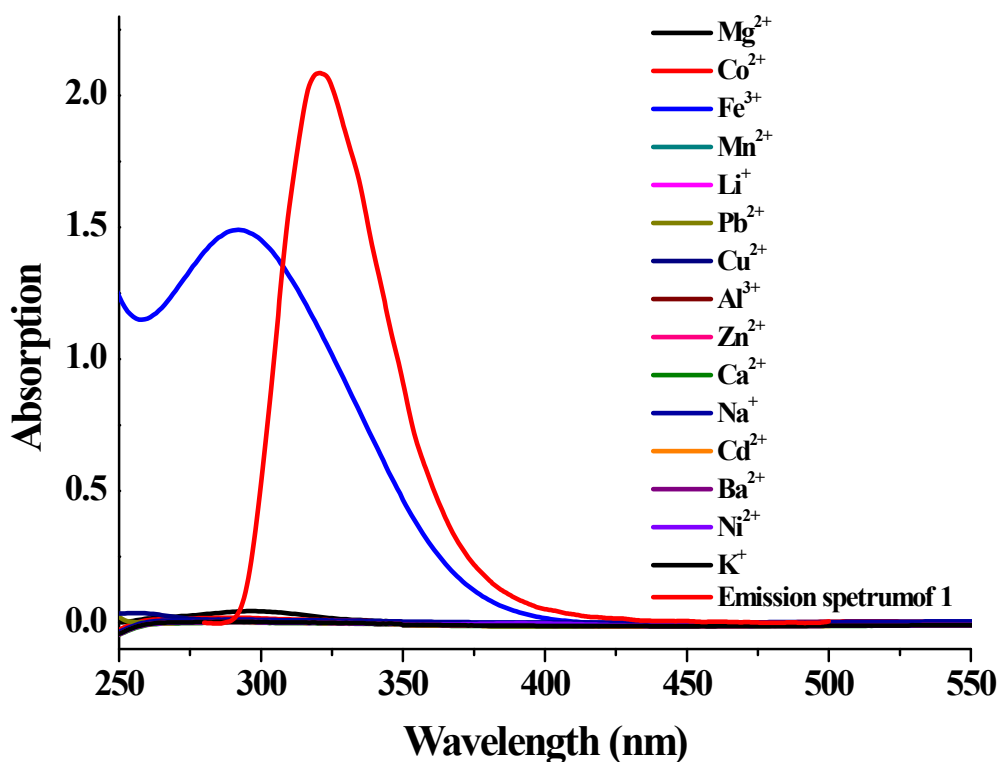

Fig. S33 Spectral overlap between absorbance spectra of metal ions and emission spectra of **1**.



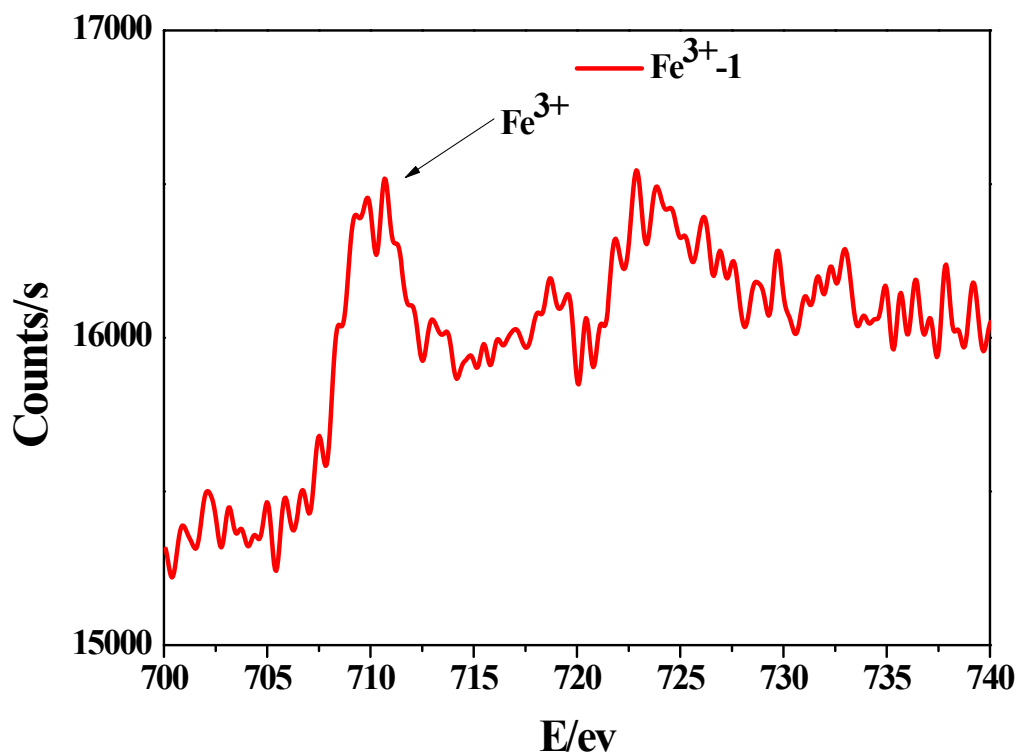

Fig. S34 The XPS of Fe<sup>3+</sup>-1 shows the typical peak of Fe<sup>3+</sup> at 710 eV

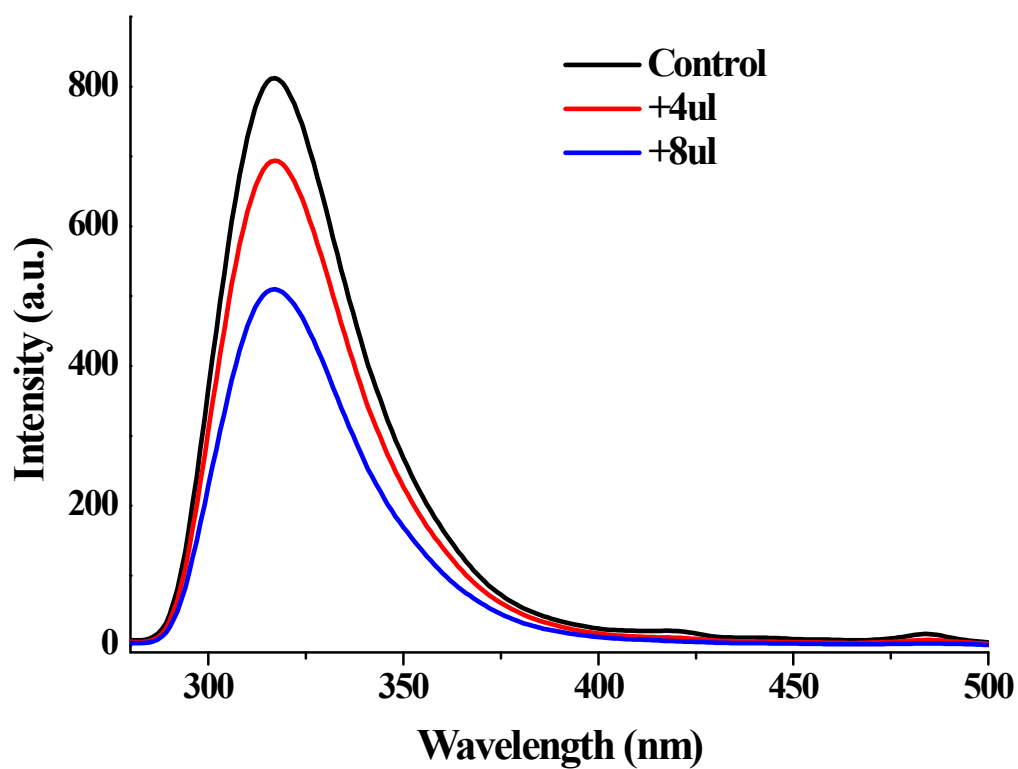

Fig. S35 The luminescence intensity of 1 upon addition 4  $\mu$ l and 8  $\mu$ l of Fe<sup>3+</sup> ions (25 mM) in drinking water.

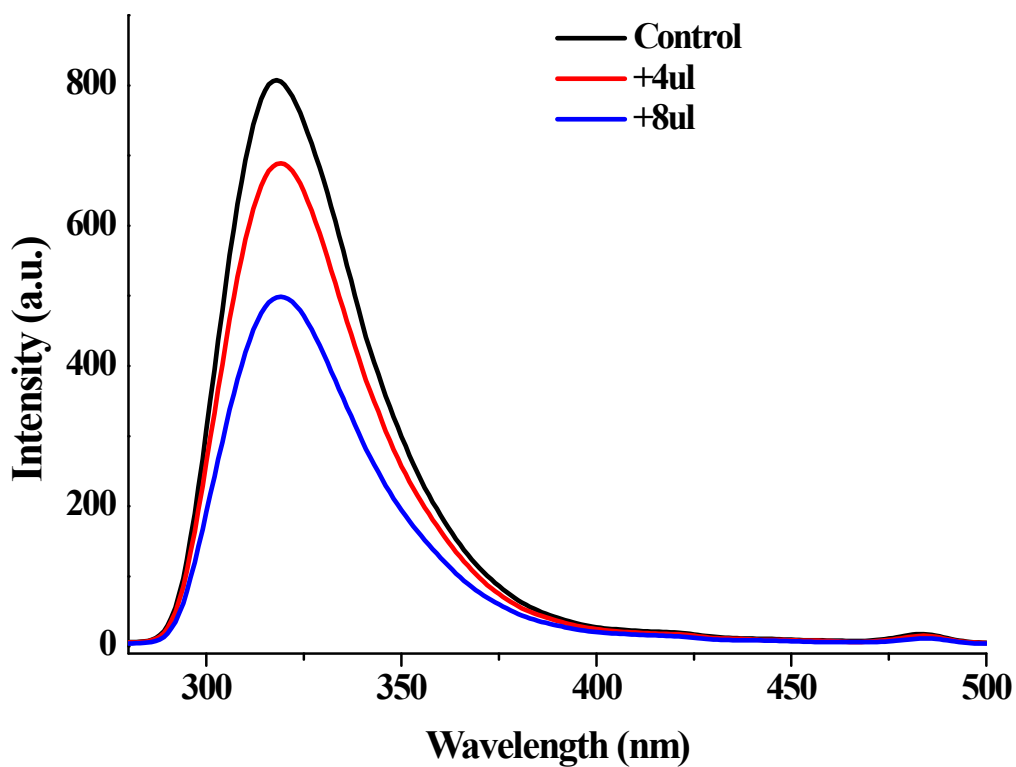

Fig. S36 The luminescence intensity of 1 upon addition 4  $\mu\text{l}$  and 8  $\mu\text{l}$  of  $\text{Fe}^{3+}$  ions (25 mM) in tap water.

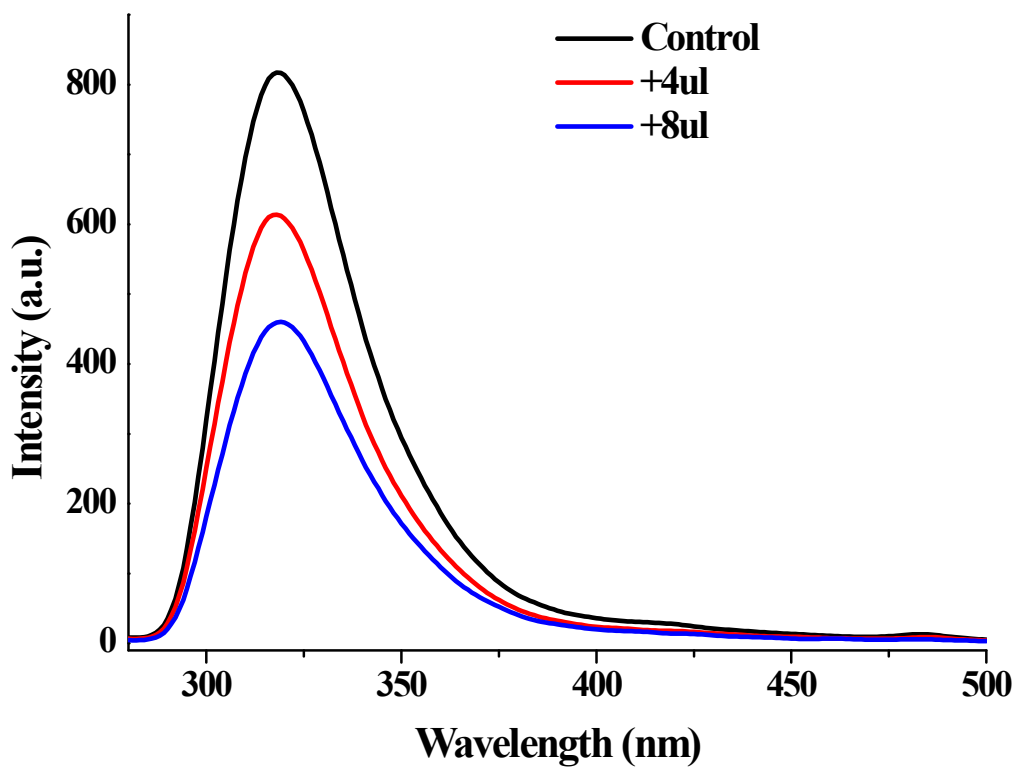

Fig. S37 The luminescence intensity of 1 upon addition 4  $\mu\text{l}$  and 8  $\mu\text{l}$  of  $\text{Fe}^{3+}$  ions (25 mM) in river water.

**Table caption**Table S1 Selected bond lengths (Å) and angles (°) for **1**

|                                      |            |                         |           |
|--------------------------------------|------------|-------------------------|-----------|
| Pb1-O2                               | 2.383(3)   | Pb2-O1                  | 2.607(4)  |
| Pb2-O2                               | 2.216(3)   | Pb2-N1                  | 2.695(11) |
| O2 <sup>3</sup> -Pb1-O2              | 113.43(10) | O1 <sup>4</sup> -Pb2-N1 | 149.6(3)  |
| O2 <sup>1</sup> -Pb1-O2              | 74.91(12)  | O2-Pb2-O1 <sup>5</sup>  | 79.3(2)   |
| O2 <sup>1</sup> -Pb1-O2 <sup>3</sup> | 113.42(10) | O2-Pb2-O2 <sup>1</sup>  | 81.69(11) |
| O2 <sup>2</sup> -Pb1-O2              | 70.0(2)    | O2-Pb2-N1               | 77.78(17) |

Symmetry codes <sup>1</sup>+X,+Y,3/2-Z; <sup>2</sup>1-X,1-Y,2-Z; <sup>3</sup>1-X,1-Y,-1/2+Z; <sup>4</sup>-1/2+X,-1/2+Y,+Z;TableS2 Summary of quenching constants ( $K_{SV}$ ) for **1** sensing of NACs at room temperature

| Analytes      | $K_{SV}(M^{-1})$   |
|---------------|--------------------|
| PA            | $5.98 \times 10^4$ |
| 2,4-DNT       | $5.92 \times 10^4$ |
| <i>m</i> -DNB | $5.29 \times 10^4$ |
| NB            | $2.85 \times 10^4$ |
| <i>p</i> -NT  | $4.51 \times 10^4$ |
| <i>o</i> -NT  | $1.68 \times 10^4$ |
| <i>m</i> -NT  | $1.99 \times 10^4$ |
| 2-Np          | $2.10 \times 10^4$ |
| 4-Np          | $3.31 \times 10^4$ |

TableS3 Summary of Limit detection (M) for **1** sensing of NACs at room temperature

| Nitro explosives | Slope( $M^{-1}$ )  | Limit detection(M)    |
|------------------|--------------------|-----------------------|
| PA               | $1.65 \times 10^7$ | $1.58 \times 10^{-6}$ |
| NB               | $1.17 \times 10^7$ | $2.24 \times 10^{-6}$ |
| <i>m</i> -DNB    | $1.36 \times 10^7$ | $1.92 \times 10^{-6}$ |
| <i>o</i> -NT     | $7.41 \times 10^6$ | $3.53 \times 10^{-6}$ |
| <i>m</i> -NT     | $1.05 \times 10^7$ | $2.49 \times 10^{-6}$ |

|              |                      |                       |
|--------------|----------------------|-----------------------|
| <i>p</i> -NT | 1.61×10 <sup>7</sup> | 1.62×10 <sup>-6</sup> |
| 2,4-DNT      | 1.60×10 <sup>7</sup> | 1.63×10 <sup>-6</sup> |
| 2-Np         | 1.06×10 <sup>7</sup> | 2.46×10 <sup>-6</sup> |
| 4-Np         | 1.21×10 <sup>7</sup> | 2.16×10 <sup>-6</sup> |

## Molecular Orbital Calculations

The electronic properties of L ligand and NACs were studied utilizing the density functional theory (DFT) computation. Gaussian 09 suite of programs and a hybrid functional, B3LYP were employed. [1-4]

TableS4 HOMO and LUMO energies for calculated NACs and H<sub>2</sub>L at B3LYP/6-31G\* level of theory[1]

| Analytes         | Homo(ev)  | LUMO(ev)  | Bond gap |
|------------------|-----------|-----------|----------|
| PA               | -8.595166 | -4.320934 | 4.274232 |
| 2,4-DNT          | -8.41361  | -3.409107 | 5.004502 |
| <i>p</i> -NT     | -7.655022 | -2.792225 | 4.862798 |
| NB               | -7.887787 | -2.912631 | 4.975156 |
| <i>m</i> -DNB    | -8.730522 | -3.596104 | 5.134419 |
| <i>o</i> -NT     | -7.554773 | -2.746777 | 4.807996 |
| <i>m</i> -NT     | -7.55031  | -2.838932 | 4.711378 |
| 2-Np             | -7.160373 | -3.172671 | 3.987702 |
| 4-Np             | -7.290064 | -2.73967  | 4.550394 |
| H <sub>2</sub> L | -6.717239 | -1.682964 | 5.034275 |

[1] M. J. Frisch, G. W. Trucks, H. B. Schlegel, G. E. Scuseria, M. A. Robb, J. R. Cheeseman, G. Scalmani, V. Barone, B. Mennucci, G. A. Petersson, H. Nakatsuji, M. Caricato, X. Li, H. P. Hratchian, A. F. Izmaylov, J. Bloino, G. Zheng, J. L. Sonnenberg, M. Hada, M. Ehara, K. Toyota, R. Fukuda, J. Hasegawa, M. Ishida, T. Nakajima, Y. Honda, O. Kitao, H. Nakai, T. Vreven, J. J. A. Montgomery, J. E. Peralta, F. Ogliaro, M. Bearpark, J. J. Heyd, E. Brothers, K. N. Kudin, V. N. Staroverov, T. Keith, R. Kobayashi, J. Normand, K. Raghavachari, A. Rendell, J. C. Burant, S. S. Iyengar, J. Tomasi, M. Cossi, N. Rega, J. M. Millam, M. Klene, J. E. Knox, J. B. Cross, V. Bakken, C. Adamo, J. Jaramillo, R. Gomperts, R. E. Stratmann, O. Yazyev, A. J. Austin, R. Cammi, C. Pomelli, J. W. Ochterski, R. L. Martin, K. Morokuma, V. G. Zakrzewski, G. A. Voth, P. Salvador, J. J. Dannenberg, S. Dapprich, A. D. Daniels, O. Farkas, J. B. Foresman, J. V. Ortiz,

---

J. Cioslowski and D. J. Fox, Gaussian 09, Revision C.01, Gaussian, Inc., Wallingford CT, **2010**.

[2]A. D. Becke, *Physical Review A*, **1988**, *38*, 3098-3100.

[3]C. Lee, W. Yang and R. G. Parr, *Physical Review B*, **1988**, *37*, 785-789

[4]A. D. Becke, *J. Chem. Phys.*, **1993**, *98*, 5648-5652
